# Supplementary material
Source: HighWire-hosted journal article supplement (https://adc.bmj.com/content/108/5/350)
Supplement: inline-supplementary-material-1 [file inline-supplementary-material-1.pdf]

**Supplementary Table.** Number of admissions, suspected EOS cases and pathogen positive EOS cases on the neonatal ward per month to during study period.

| <b>Month/Year</b> | <b>No. of admissions</b> | <b>No. of suspected EOS cases (% of admissions)</b> | <b>No. of pathogen positive EOS cases (% of suspected EOS cases)</b> |
|-------------------|--------------------------|-----------------------------------------------------|----------------------------------------------------------------------|
| May-18            | 386                      | 81 (21)                                             | 11 (14)                                                              |
| Jun-18            | 333                      | 73 (22)                                             | 16 (22)                                                              |
| Jul-18            | 286                      | 68 (24)                                             | 8 (12)                                                               |
| Aug-18            | 273                      | 72 (26)                                             | 6 (8.3)                                                              |
| Sep-18            | 290                      | 87 (30)                                             | 11 (13)                                                              |
| Oct-18            | 313                      | 97 (31)                                             | 5 (5.2)                                                              |
| Nov-18            | 315                      | 83 (26)                                             | 8 (9.6)                                                              |
| Dec-18            | 329                      | 93 (28)                                             | 7 (7.5)                                                              |
| Jan-19            | 345                      | 105 (30)                                            | 6 (5.7)                                                              |
| Feb-19            | 380                      | 116 (31)                                            | 13 (11)                                                              |
| Mrt-19            | 355                      | 101 (28)                                            | 6 (5.9)                                                              |
| Apr-19            | 348                      | 96 (28)                                             | 8 (8.3)                                                              |
| May-19            | 355                      | 77 (22)                                             | 4 (5.2)                                                              |

**Supplementary figure.** Most common bacterial isolates and their mortality in culture-confirmed early-onset sepsis per gestational age category\*

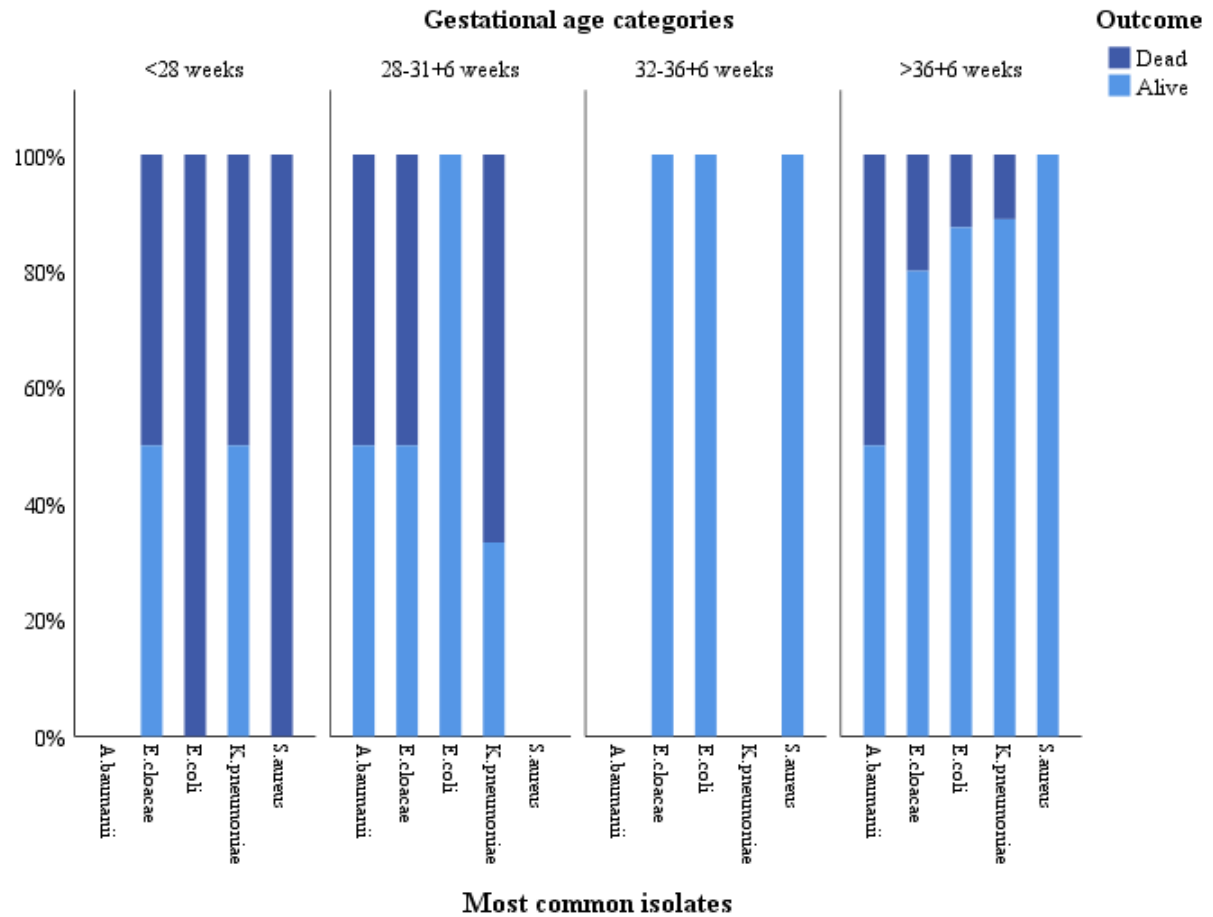

*S. aureus*: includes methicillin-resistant *S. aureus* (MRSA)

\* unknown gestational ages not included.
